# Supplementary material
Source: PubMed Central journal article supplement (PMC2427309)
Supplement: mmc1.pdf [file mmc1.pdf]

## Supplemental Data

### Alopecia, Neurological Defects, and Endocrinopathy

### Syndrome Caused by Decreased Expression of RBM28,

### a Nucleolar Protein Associated with Ribosome Biogenesis

Janna Nousbeck, Ronen Spiegel, Akemi Ishida-Yamamoto, Margarita Indelman, Ayelet Shani-Adir, Noam Adir, Ehud Lipkin, Sivan Bercovici, Dan Geiger, Maurice A. van Steense Peter M. Steijlen, Reuven Bergman, Albrecht Bindereif, Mordechai Choder, Stavit Shalev, and Eli Sprecher

**Table S1. Oligonucleotide Sequences: Genomic *RBM28* DNA Amplification**

| Exon  | Sequence (5'–3')                                        | Product Size (bp) | T <sub>m</sub> |
|-------|---------------------------------------------------------|-------------------|----------------|
| 1     | F- GTGTGAGCTTGGTTGTCC<br>R- CAGTCCCTGTCCCTTCTC          | 331               | 57             |
| 2-3   | F- GGCAAAGTATAGCAAGATG<br>R- GGTAAGGTTGATTCCCAG         | 830               | 57             |
| 4-5   | F- TTGCTGTGATTGTGTTTCTC<br>R- AATGCAGAAAGTGGGTTAC       | 680               | 57             |
| 6     | F- CTTTGTCTCCACTGGTTCC<br>R- CTGGAATTACAGGCAAGAG        | 308               | 57             |
| 7-8   | F- CGATGAAACCAAGAAGTTC<br>R- CAGAAGTATGCTCATTTC         | 672               | 57             |
| 9     | F- CTGCGCCAGGCTTATCT<br>R- GGACCAGATGTGCTTGATC          | 293               | 57             |
| 10    | F- CAAGGGAGAGTTGATATCTAAC<br>R- GCTGGATGGACTGTGAAC      | 324               | 57             |
| 11    | F- CCCTTCCACTCTGTGTCAG<br>R- CCCTAAGAGCCAAACTGC         | 226               | 57             |
| 12    | F- CTTGAACTCCTGACCTCAG<br>R- GAAACATGCTTCCAGGC          | 346               | 57             |
| 13    | F- GACCTAACCAATGCCAC<br>R- CAGAACGTGAAGGTCAATG          | 242               | 57             |
| 14    | F- GTGTGGTTATGGGATGAGG<br>R- CAACAGAGTGAGACTTCGTC       | 385               | 57             |
| 15-16 | F- CAATAGCCTGATTTCTTATTGAC<br>R- CTAAGTGGGGGAGAACTACTC  | 644               | 57             |
| 17    | F- CACATAAAGCTCATCTTCTGC<br>R- GTTAACCCCATGTGTGG        | 480               | 57             |
| 18    | F- GAATGACTTCACTTATCATGGG<br>R- GCTCAACTAACCAAGGTACAAAC | 289               | 57             |
| 19    | F- CTGTCCCACTTACTTTCTCTC<br>R- GAGGAGCCCAGGAGTGTC       | 296               | 57             |

**Table S2. Quantitative Real-Time PCR**

| Gene         | Exon | Sequence (5'–3')                                       | Product Size (bp) | T <sub>m</sub> |
|--------------|------|--------------------------------------------------------|-------------------|----------------|
| <i>RBM28</i> | 2-3  | F- GGAGTAAGGCATGTCGAG<br>R- CACTTAAAGCTCAGGTTCC        | 256               | 60             |
| <i>ACTB</i>  | 3-4  | F- TTGCCGACAGGATGCAGAAGGA<br>R- AGGTGGACAGCGAGGCCAGGAT | 127               | 60             |
